# Supplementary material for: Fructose-Induced Insulin Resistance in Adult Rats and Moderate-Intensity Training during Peri-Pubertal Period Improves Metabolic Dysfunction
Source: Preprints.org preprint supplement (doi:10.20944/preprints202307.1077.v1), 2023-07-17
Supplement: Supplementary file 1 [file Supplementary material - additional graphs.docx]

**Supplementary material**

**
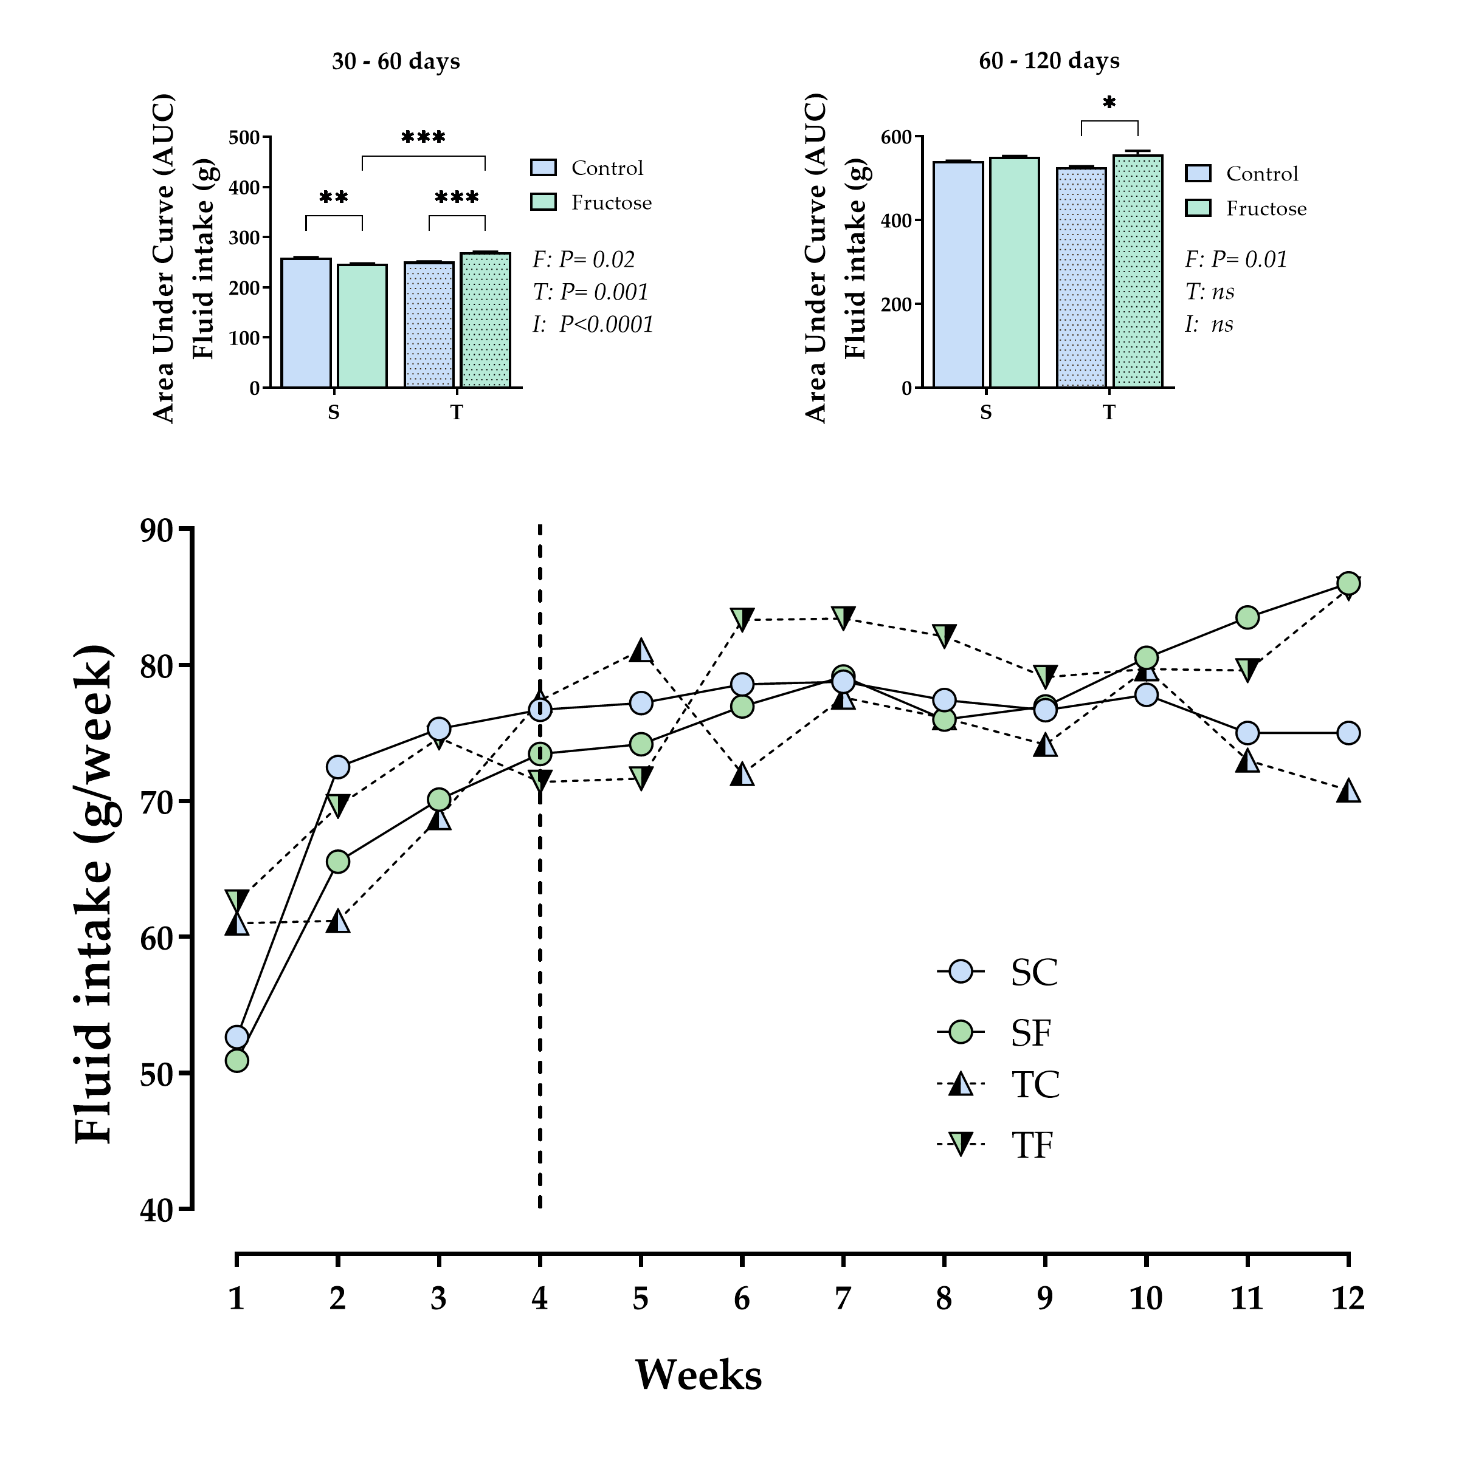
**

*Fluid intake.* The values are presented as the mean ± SEM of 8-10 rats per group. Fluid intake from 30 to 120 days-old. Repeated measures ANOVA with Sidak’s post hoc test was performed to analyze the evolution of fluid intake. Two-way ANOVA and Tukey’s post hoc test were used for AUCs comparison in each figure. SC, sedentary rats subjected a normal diet; SF, sedentary rats subjected a fructose diet; TC, trained animals subjected to a normal diet; and TF, trained animals subjected to a fructose diet. F, fructose factor; T, training factor; and I, interaction between fructose and training factors.
