# Supplementary material for: Fructose-Induced Insulin Resistance in Adult Rats and Moderate-Intensity Training during Peri-Pubertal Period Improves Metabolic Dysfunction
Source: Preprints.org preprint supplement (doi:10.20944/preprints202307.1077.v1), 2023-07-17
Supplement: Supplementary file 2 [file supplementary]

Archive with 3 entries (3 files):
- Supplementary material - BioRender Publication License Jul-08-2023.pdf
- Supplementary material - additional graphs.docx
- Supplementary material - additional tables.xlsx
