# Supplementary material for: Fructose-Induced Insulin Resistance in Adult Rats and Moderate-Intensity Training during Peri-Pubertal Period Improves Metabolic Dysfunction
Source: Preprints.org preprint supplement (doi:10.20944/preprints202307.1077.v1), 2023-07-17
Supplement: Supplementary file 2 [file Supplementary material - additional tables.xlsx]

## Sheet: Plan1
A - Periodization of training								B - Treadmill running adaptation					C - ET to determine FWL and VO2max						D - Treadmill running protocol
Days/Weeks		2023 May						Days of week	Intensity		Time (min)		Steps of ET		Time	Intensity/Speed			MIT session		Time	Intensity/Speed
		1st	2nd	3rd	4th	4th			Speed (cm/s)	Speed (km/h)			Rest (gas exchange)		5 min	0			Heating		2 min	20 cm/s
Monday		1	8	15	22	29		Monday	16 cm/s	0.6 km/h	10 min		Heating		5 min	10 cm/s			MIT		40 min	55% - 58% - 60% - 60% - 63% - 65% (FWL on VO2max)
Tuesday		2	9	16	23	30		Tuesday	16 cm/s	0.6 km/h	12 min		Increments load ET		3 min	9 cm/s			Cool down		2 min	20 cm/s
Wednesday		3	10	17	24	31		Wednesday	16 cm/s	0.6 km/h	14 min								Total time		44 min	Days of week			M	W	F
Thursday		4	11	18	25			Thursday	16 cm/s	0.6 km/h	16 min
Friday		5	12	19	26			Friday	16 cm/s	0.6 km/h	18 min
Saturday		6	13	20	27			Saturday	R	R	R
Sunday		7	14	21	28			Sunday	ET	0,6 km/h	18 min
Phases		GP	SP
		Subtitles
		A	Adaptation
		R	Rest
		ET	Effort test
		GP	General preparation
		SP	Specific preparation
		MIT	Moderate intensity trainig
		PND	Postnatal day
	% per cage in a 15-day microcycle
	Days of week
	M	W	F	M	W	F
	0.55	0.58	0.6	0.6	0.63	0.65
